# Supplementary material for: In situ epitaxial growth of Ag3PO4 quantum dots on hematite nanotubes for high photocatalytic activities
Source: Royal Society of Chemistry journal article supplement (doi:10.1039/c9qi00744j), 2019-01-01
Supplement: c9qi00744j1.pdf [file c9qi00744j1.pdf]

## Electronic Supplementary Information

### ***In-situ* Epitaxial Growth of Ag<sub>3</sub>PO<sub>4</sub> Quantum Dots on Hematite Nanotubes for High Photocatalytic Activities**

Junyuan Duan,<sup>ab</sup> Leilei Xu,<sup>a</sup> Youwen Liu<sup>b</sup>, Bingxin Liu,<sup>c</sup> Tianyou Zhai<sup>\*b</sup> and Jianguo Guan<sup>\*a</sup>

a State Key Laboratory of Advanced Technology for Materials Synthesis and Processing, International School of Materials Science and Engineering, Wuhan University of Technology, Wuhan 430070, China. E-mail: [guanjg@whut.edu.cn](mailto:guanjg@whut.edu.cn)

b State Key Laboratory of Material Processing and Die & Mould Technology, School of Materials Science and Engineering, Huazhong University of Science and Technology, Wuhan 430074, China. E-mail: [zhaity@hust.edu.cn](mailto:zhaity@hust.edu.cn)

c Qinghai Provincial Key Laboratory of New Light Alloys, Qinghai University, Xining 810016, China

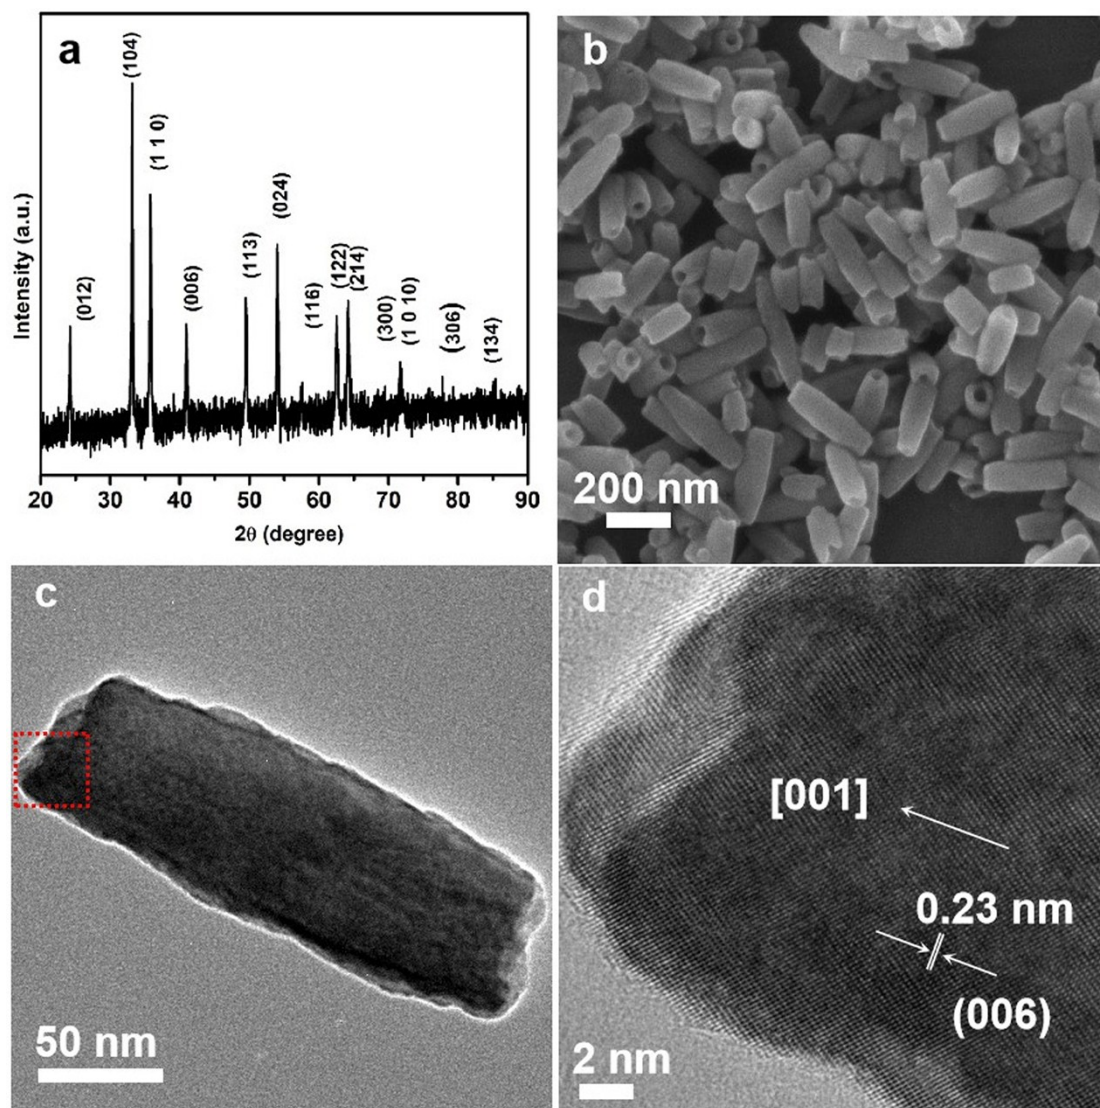

**Fig. S1** (a) XRD pattern, (b) SEM and (c) TEM images of the  $\text{Fe}_2\text{O}_3$  NTs; (e) the HRTEM image indicated with a rectangular frame in (c). The results indicate that the as-prepared products are uniform and dispersible hexagonal-phase  $\text{Fe}_2\text{O}_3$  (JCPDS card No. 33-0664) single-crystalline NTs. They have a diameter of 60-80 nm and a length of 150-200 nm. The growth direction is along [001].

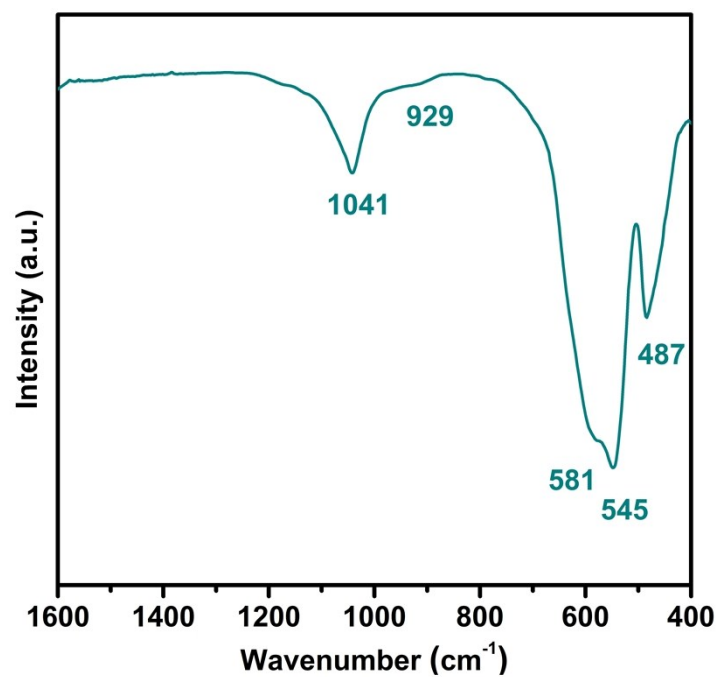

**Fig. S2** FTIR spectrum of the pure Fe<sub>2</sub>O<sub>3</sub> NTs. In the spectrum, the two absorption peaks at 1041 and 929 cm<sup>-1</sup> correspond to the asymmetric stretching vibration of P-O-P group and symmetric stretching vibration of PO group of PO<sub>4</sub><sup>3-</sup> anions, respectively.

S1

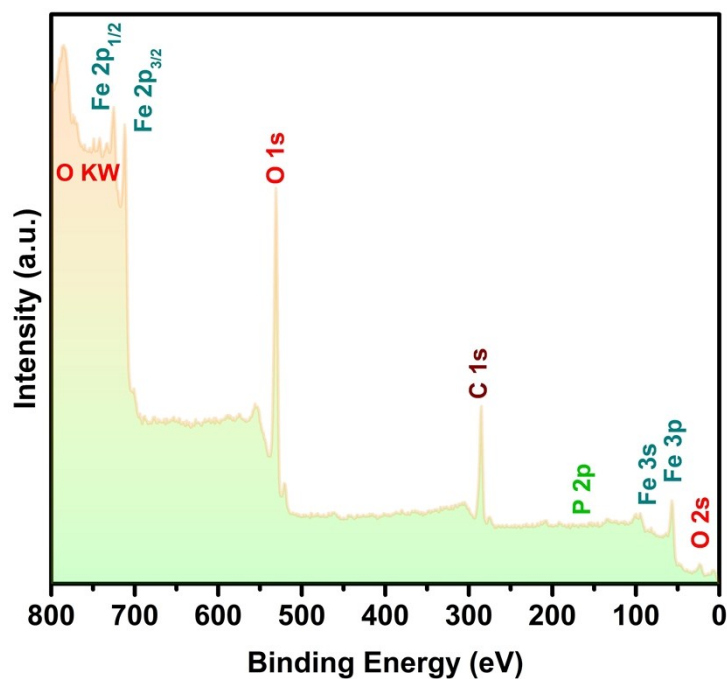

**Fig. S3** XPS full spectrum of the pure Fe<sub>2</sub>O<sub>3</sub> NTs.

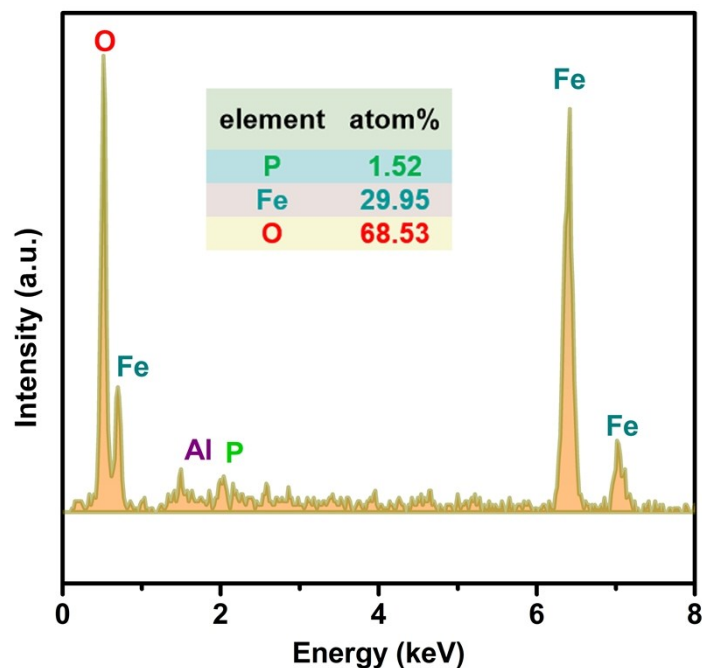

**Fig. S4** EDX spectrum of the pure  $\text{Fe}_2\text{O}_3$  NTs. The inset is the corresponding atomic ratio, indicating that the molar ratio of P to Fe in the  $\text{Fe}_2\text{O}_3$  NTs is 0.05:1.

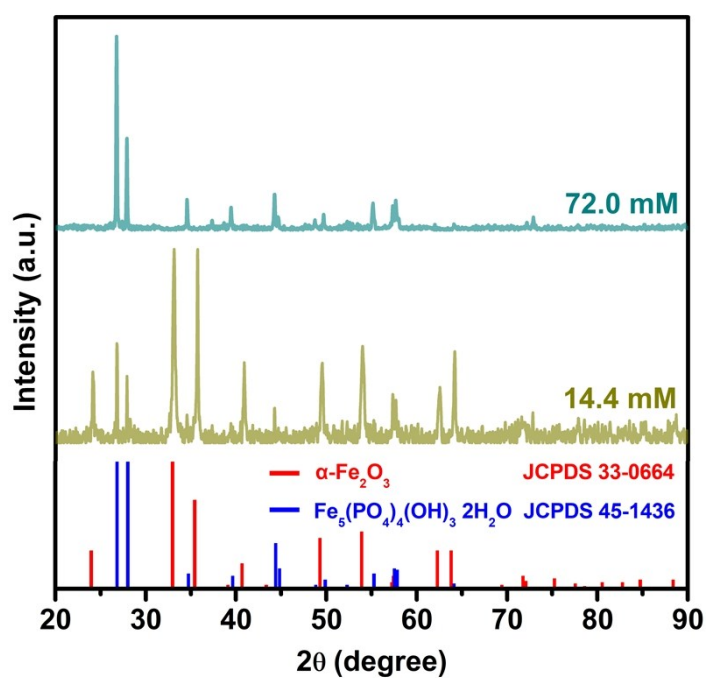

**Fig. S5** XRD patterns of the samples obtained at  $[\text{NH}_4\text{H}_2\text{PO}_4]$  of 14.4 and 72.0 mM respectively, suggesting that the adsorbed phosphate anions in  $\text{Fe}_2\text{O}_3$  NTs exist as a form of  $\text{Fe}_5(\text{PO}_4)_4(\text{OH})_3 \cdot 2\text{H}_2\text{O}$ .

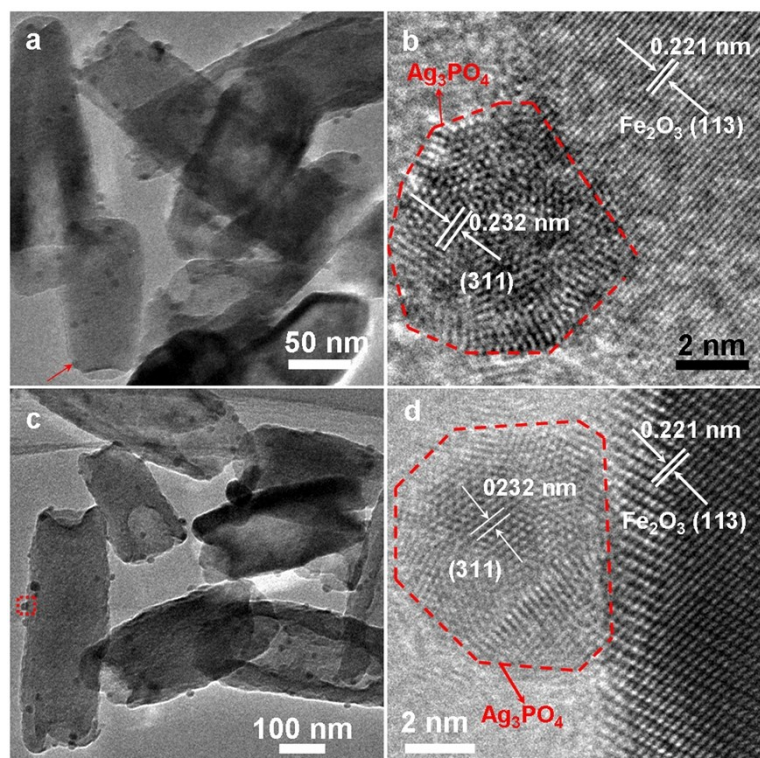

**Fig. S6** (a, c) TEM images for two other junctions of  $\text{Ag}_3\text{PO}_4/\text{Fe}_2\text{O}_3$  HNSs. (b, d) The corresponding HRTEM images of the areas indicated with an arrow and a rectangular frame in (a) and (c) respectively



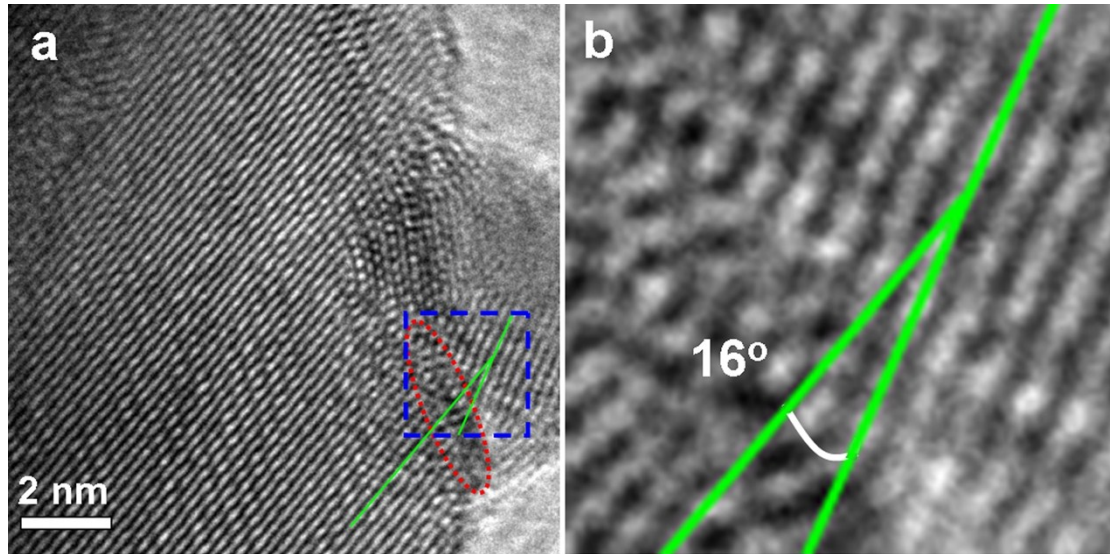

**Fig. S7** (a) Constructed inverse FFT image along the growth direction for the HRTEM image of Figure 2c. (b) The enlarged image of the area indicated with a rectangular frame in (a). The area indicated by a red elliptical frame in (a) shows the typical lattice fringe distortion at the hetero-interface. The distortion at the hetero-interface was calculated to be 8.8% ( $(16^\circ/180^\circ) \times 100\% = 8.8\%$ ). And the lattice mismatch between  $\text{Ag}_3\text{PO}_4$  (311) and  $\text{Fe}_2\text{O}_3$  (113) was 4.74% ( $((0.221 - 0.232)/0.232) \times 100\% = 4.74\%$ ).

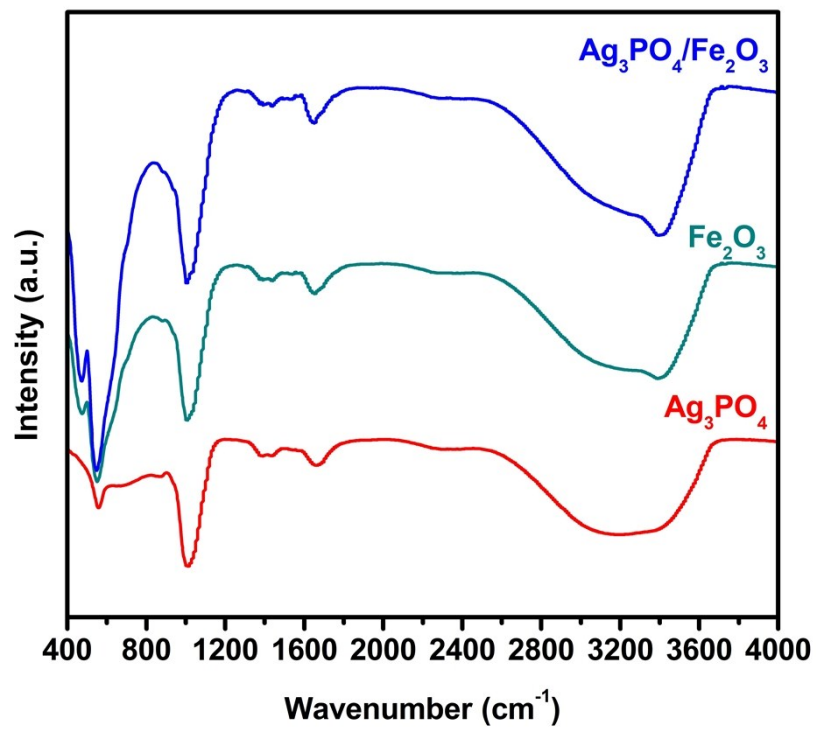

**Fig. S8** FTIR spectra of the  $\text{Fe}_2\text{O}_3$  NTs,  $\text{Ag}_3\text{PO}_4$  and  $\text{Ag}_3\text{PO}_4/\text{Fe}_2\text{O}_3$  NT-HNs.

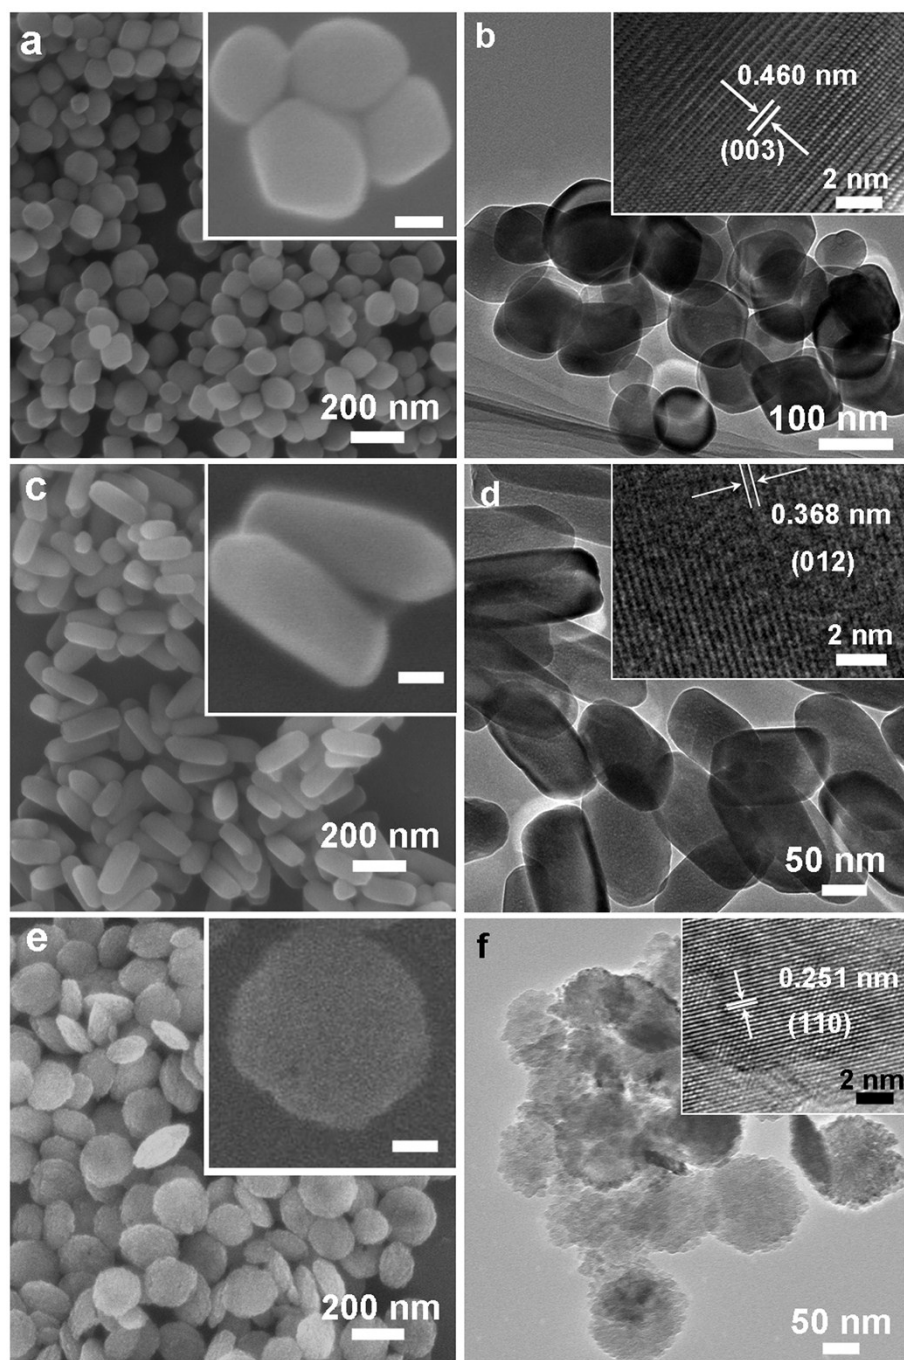

**Fig. S9** SEM and TEM images of the  $\text{Fe}_2\text{O}_3$  samples obtained at  $[\text{NH}_4\text{H}_2\text{PO}_4]$  of (a, b) 0, (c, d) 0.36 and (e, f) 1.44 mM respectively. The insets are the corresponding high magnification SEM (a, c and e) and HRTEM (b, d and f) images. The scale bars in the insets of (a), (c) and (e) are all 50 nm.



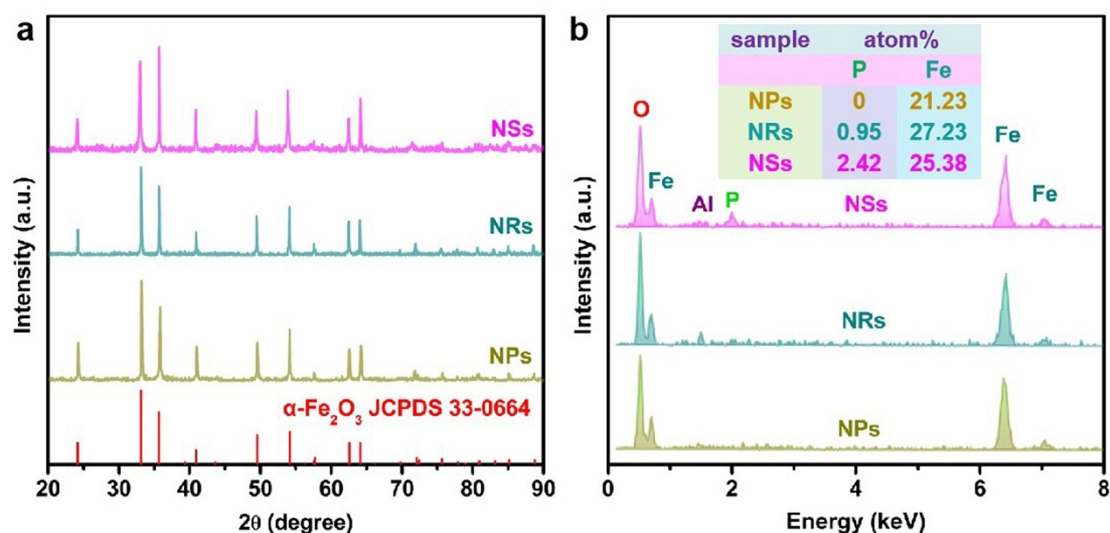

**Fig. S10** (a) XRD patterns and (b) EDX spectra of  $\text{Fe}_2\text{O}_3$  nanoparticles (NPs), nanorods (NRs) and nanosheets (NSs) samples. The inset in (b) lists the atomic percentage of P and Fe elements in the three samples, indicating that the atomic ratio of P to Fe in the  $\text{Fe}_2\text{O}_3$  NPs, NRs and NSs is 0, 0.03:1 and 0.10:1, respectively.

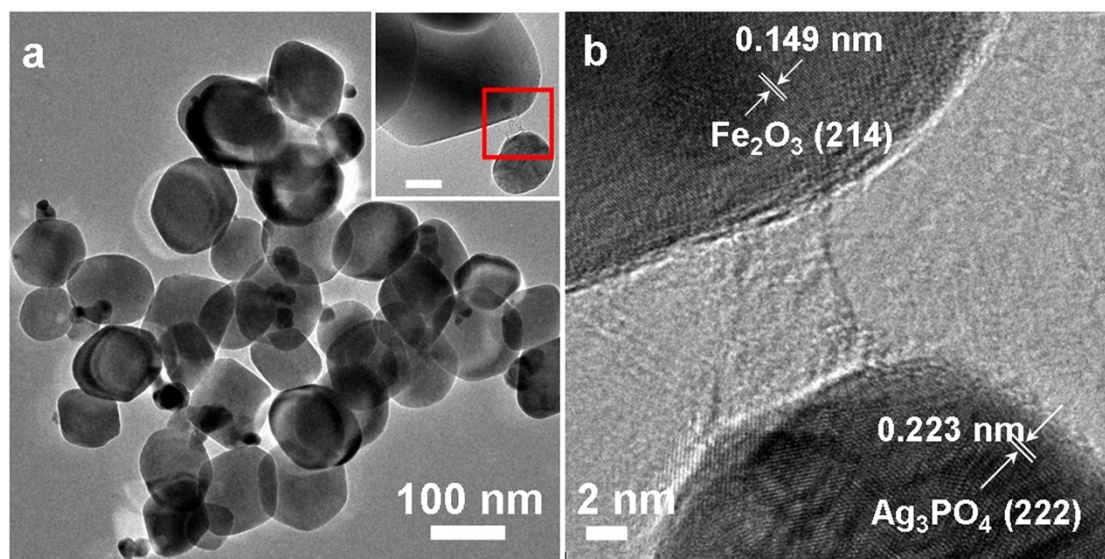

**Fig. S11** TEM (a) and HRTEM (b) images of the samples obtained by using the  $\text{Fe}_2\text{O}_3$  nanoparticles free of  $\text{PO}_4^{3-}$  as raw materials. The scale bar in the inset of (a) is 20 nm.

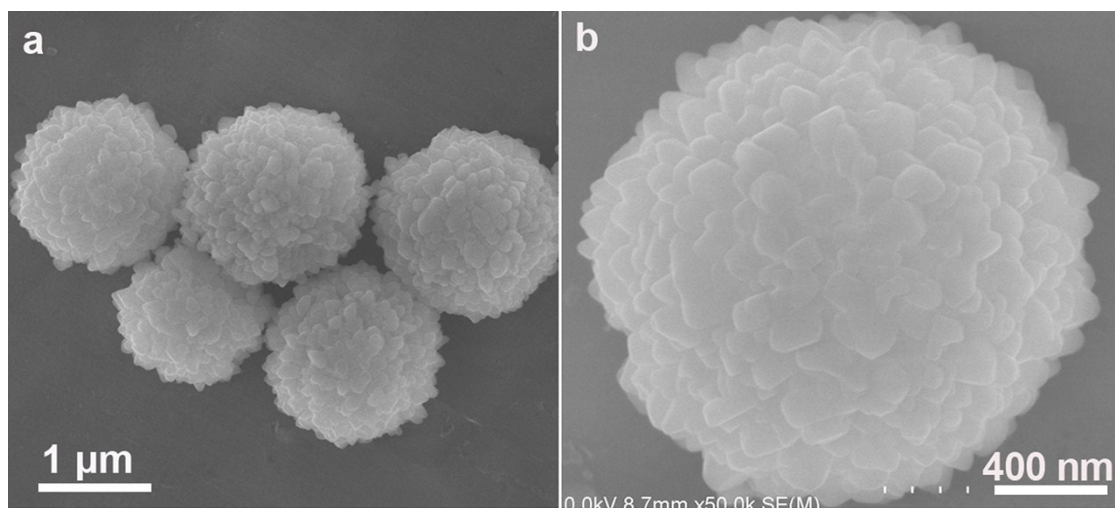

**Fig. S12** (a, b) SEM images of the  $\text{Fe}_5(\text{PO}_4)_4(\text{OH})_3 \cdot 2\text{H}_2\text{O}$  particles corresponding to the samples obtained at  $[\text{NH}_4\text{H}_2\text{PO}_4]$  of 72.0 mM.

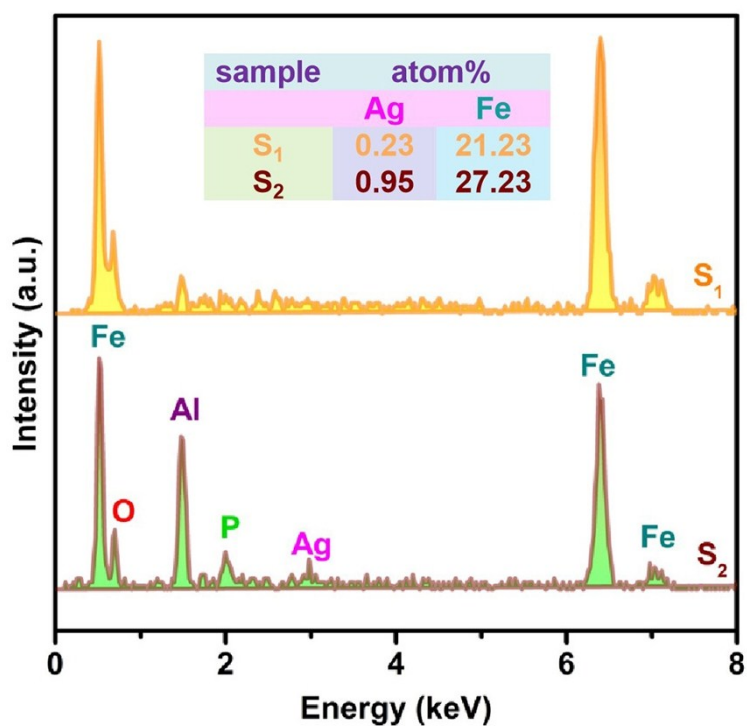

**Fig. S13** EDX spectra of the  $\text{Ag}_3\text{PO}_4/\text{Fe}_2\text{O}_3$  heterostructures obtained by using the  $\text{Fe}_2\text{O}_3$  nanostructures with different  $\text{PO}_4^{3-}$  contents of 2.43% and 4.83% as raw materials.

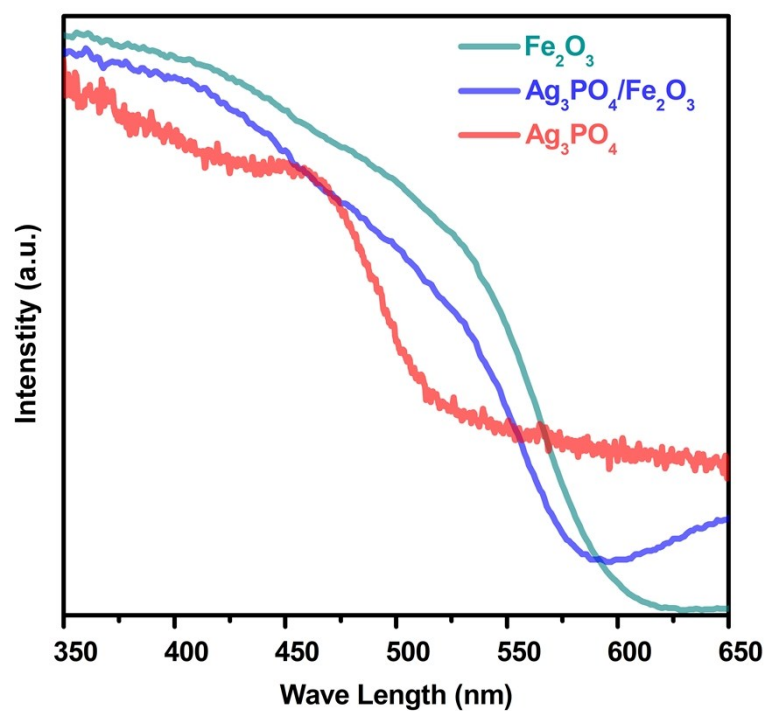

**Fig. S14** UV/Vis absorption spectra of the as-prepared  $\text{Ag}_3\text{PO}_4/\text{Fe}_2\text{O}_3$  NT-HNSs,  $\text{Fe}_2\text{O}_3$  NTs and  $\text{Ag}_3\text{PO}_4$  QDs.

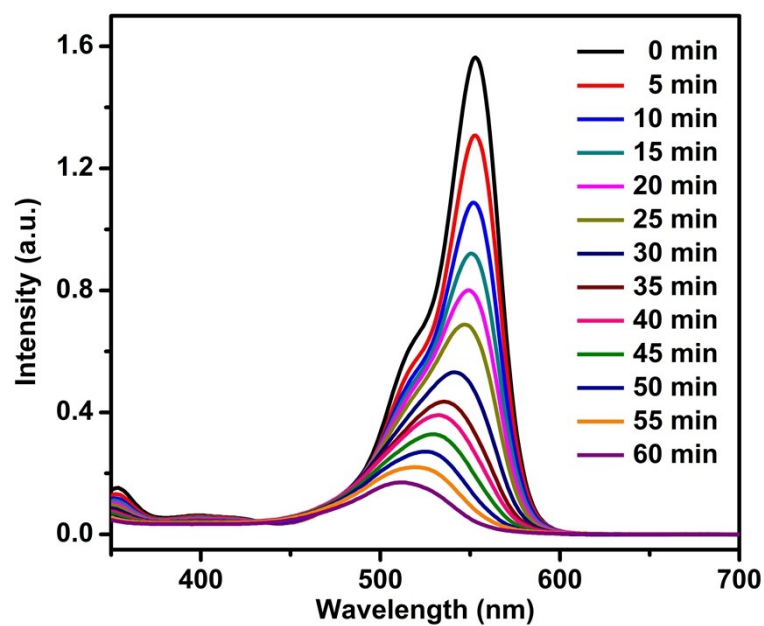

**Fig. S15** Absorption spectra of the RhB solution containing the  $\text{Ag}_3\text{PO}_4/\text{Fe}_2\text{O}_3$  NT-HNSs as a function of visible light irradiation time ( $t$ ).

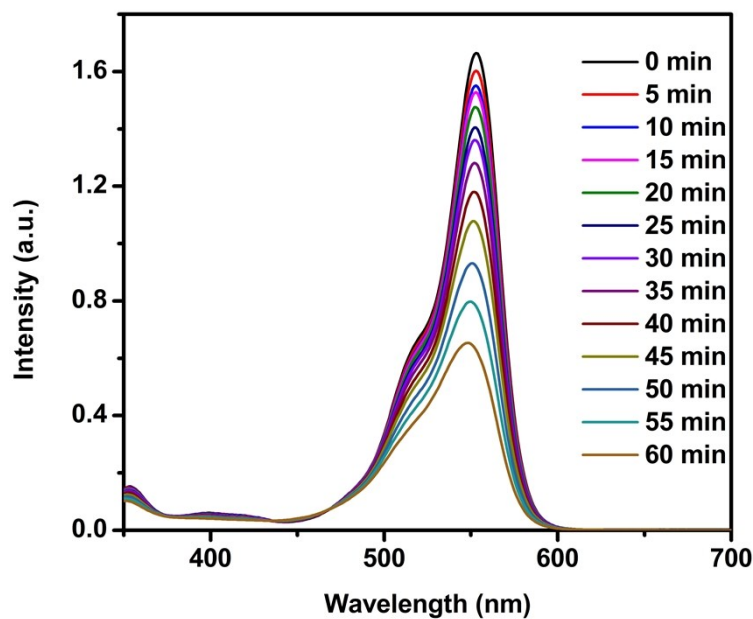

**Fig. S16** Absorption spectra of the RhB solution containing the hetero-nanostructures photocatalysts with  $\text{Ag}_3\text{PO}_4$  QDs growing on  $\text{Fe}_2\text{O}_3$  NRs (Fig. 4 b-c) as a function of visible light irradiation time ( $t$ ).

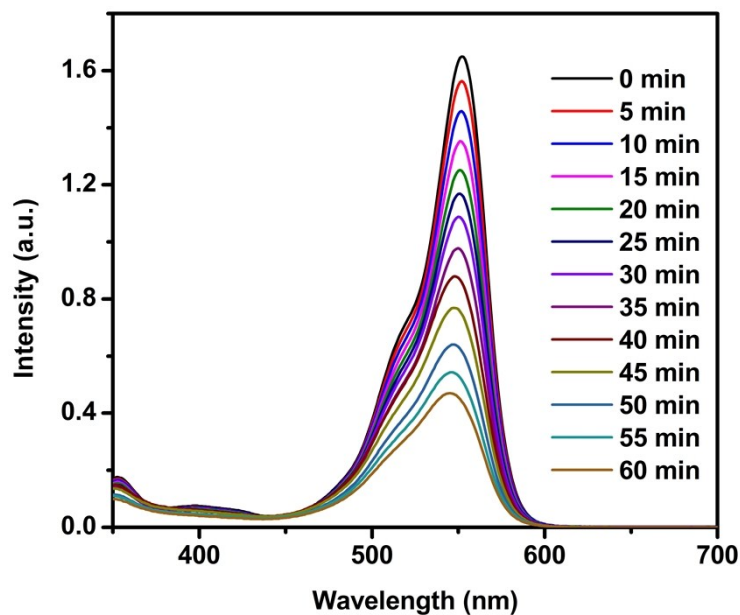

**Fig. S17** Absorption spectra of the RhB solution containing the hetero-nanostructures photocatalysts with  $\text{Ag}_3\text{PO}_4$  QDs growing on  $\text{Fe}_2\text{O}_3$  NSs (Fig. 4 d-e) as a function of visible light irradiation time ( $t$ ).

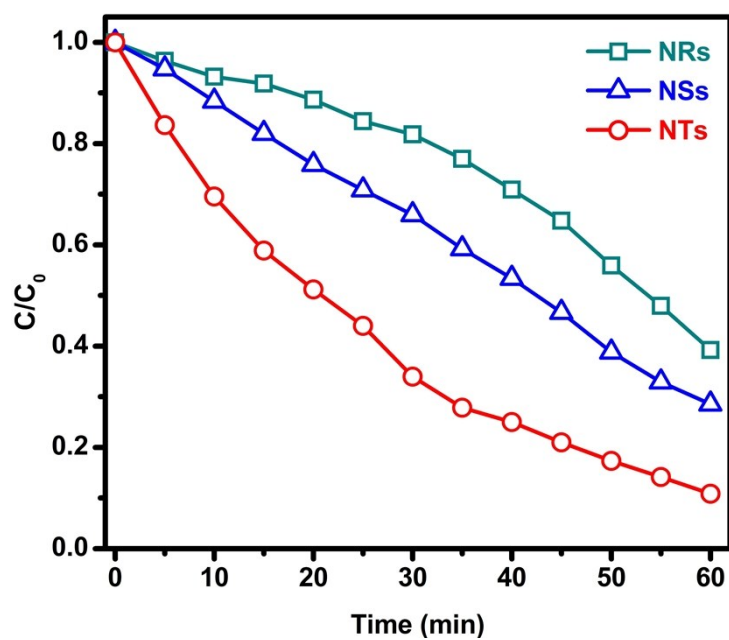

**Fig. S18** Photocatalytic activities of the hetero-nanostructures photocatalysts with  $\text{Ag}_3\text{PO}_4$  QDs growing on  $\text{Fe}_2\text{O}_3$  NTs (Fig. 2), NRs (Fig. 4 b-c) and NSs (Fig. 4 d-e) for the decoloration of RhB in aqueous solution.

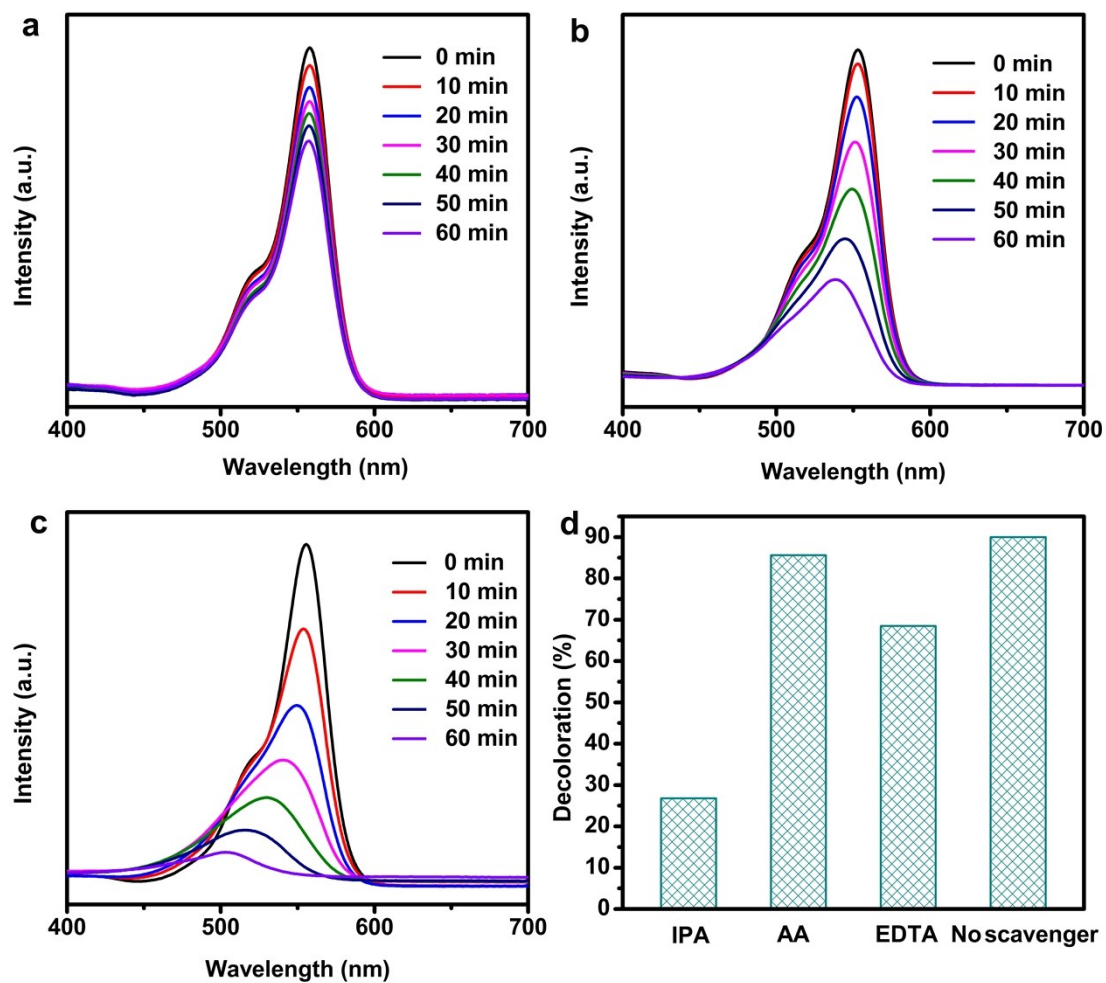

**Fig. S19** Absorption spectra of the RhB solution over the  $\text{Ag}_3\text{PO}_4/\text{Fe}_2\text{O}_3$  NT-HNSs by using (a) IPA, (b) AA, (c) EDTA as scavenger respectively. (d) The decoloration rate of RhB over  $\text{Ag}_3\text{PO}_4/\text{Fe}_2\text{O}_3$  HNSs with scavenger (IPA, AA, EDTA) or without scavenger.



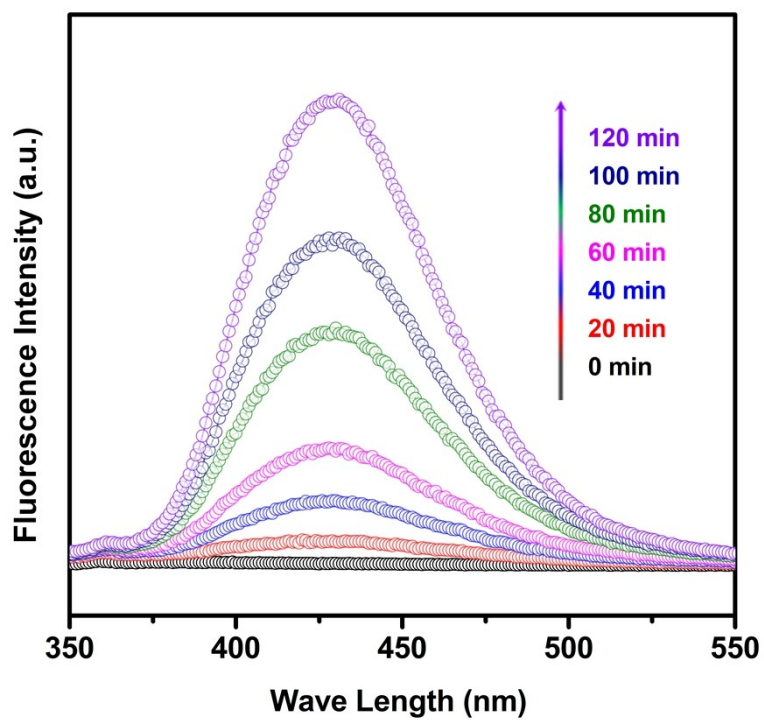

**Fig. S20** PL intensity changes of the terephthalic acid at about 430 nm using  $\text{Ag}_3\text{PO}_4/\text{Fe}_2\text{O}_3$  NT-HNSs as catalysts under light irradiation over time.

#### Reference

- S1 C.J. Jia, L.D. Sun, Z.G. Yan, L.P. You, F. Luo, X.D. Han, Y.C. Pang, Z. Zhang and C.H. Yan, *Angew. Chem. Int. Ed.*, 2005, **44**, 4328-4333.
